# Supplementary material
Source: Springer Nature journal article supplement (https://www.springermedizin.de/resource/supplementary/12931_2013_1383_MOESM2_ESM.pdf/9426148)
Supplement: MOESM2 [file 9426148]

**Additional File 2: Table S1. Ciliated Cell-associated Genes**

| <b>Gene symbol</b> | <b>Gene name</b>                             | <b>Function</b>                                                   | <b>References</b> |
|--------------------|----------------------------------------------|-------------------------------------------------------------------|-------------------|
| CETN2              | Centrin 2                                    | Ca <sup>2+</sup> -binding protein, component of centrioles        | [1-3]             |
| DNALI1             | Dynein, axonemal, light intermediate chain 1 | Component of dynein arms                                          | [3-5]             |
| DNAH11             | Dynein, axonemal, heavy chain 11             | Component of dynein arms                                          | [4]               |
| DNAI1              | Dynein, axonemal, intermediate chain 1       | Component of dynein arms                                          | [4-6]             |
| EFHC1              | EF-hand domain (C-terminal) containing 1     | Ca <sup>2+</sup> -binding protein, abundant in cilia and flagella | [1,3,5]           |
| SPAG6              | Sperm associated antigen 6                   | Component of central pair complex                                 | [3,6,7]           |
| TEKT1              | Tektin 1                                     | Component of cilia microtubules                                   | [1,5,8]           |
| TEKT2              | Tektin 2                                     | Component of cilia microtubules                                   | [5,6,8]           |
| TUBA1A             | Tubulin, alpha 1A                            | Component of cilia microtubules                                   | [3]               |

## Additional File 2: Table S1 References

1. Yu,X, Ng CP, Habacher H, Roy S: **Foxj1 transcription factors are master regulators of the motile ciliogenic program.** *Nat Genet* 2008, **40**: 1445-1453
2. Laoukili,J, Perret E, Middendorp S, Houcine O, Guennou C, Marano F, Bornens M, Tournier F: **Differential expression and cellular distribution of centrin isoforms during human ciliated cell differentiation in vitro.** *J Cell Sci* 2000, **113 ( Pt 8)**: 1355-1364
3. Ross,AJ, Dailey LA, Brighton LE, Devlin RB: **Transcriptional profiling of mucociliary differentiation in human airway epithelial cells.** *Am J Respir Cell Mol Biol* 2007, **37**: 169-185
4. Becker-Heck,A, Zohn IE, Okabe N, Pollock A, Lenhart KB, Sullivan-Brown J, McSheene J, Loges NT, Olbrich H, Haeffner K, Fliegau M, Horvath J, Reinhardt R, Nielsen KG, Marthin JK, Baktai G, Anderson KV, Geisler R, Niswander L, Omran H, Burdine RD: **The coiled-coil domain containing protein CCDC40 is essential for motile cilia function and left-right axis formation.** *Nat Genet* 2011, **43**: 79-84
5. Thomas,J, Morle L, Soulavie F, Laurencon A, Sagnol S, Durand B: **Transcriptional control of genes involved in ciliogenesis: a first step in making cilia.** *Biol Cell* 2010, **102**: 499-513
6. Stubbs,JL, Oishi I, Izpisua Belmonte JC, Kintner C: **The forkhead protein Foxj1 specifies node-like cilia in Xenopus and zebrafish embryos.** *Nat Genet* 2008, **40**: 1454-1460
7. Sapiro,R, Kostetskii I, Olds-Clarke P, Gerton GL, Radice GL, Strauss III JF: **Male infertility, impaired sperm motility, and hydrocephalus in mice deficient in sperm-associated antigen 6.** *Mol Cell Biol* 2002, **22**: 6298-6305
8. Amos,LA: **The tektin family of microtubule-stabilizing proteins.** *Genome Biol* 2008, **9**: 229
